# Supplementary material for: Predicting individual contrast sensitivity functions from acuity and letter contrast sensitivity measurements
Source: PubMed Central journal article supplement (PMC5221673; doi:10.1167/16.15.15), 2016-12-22

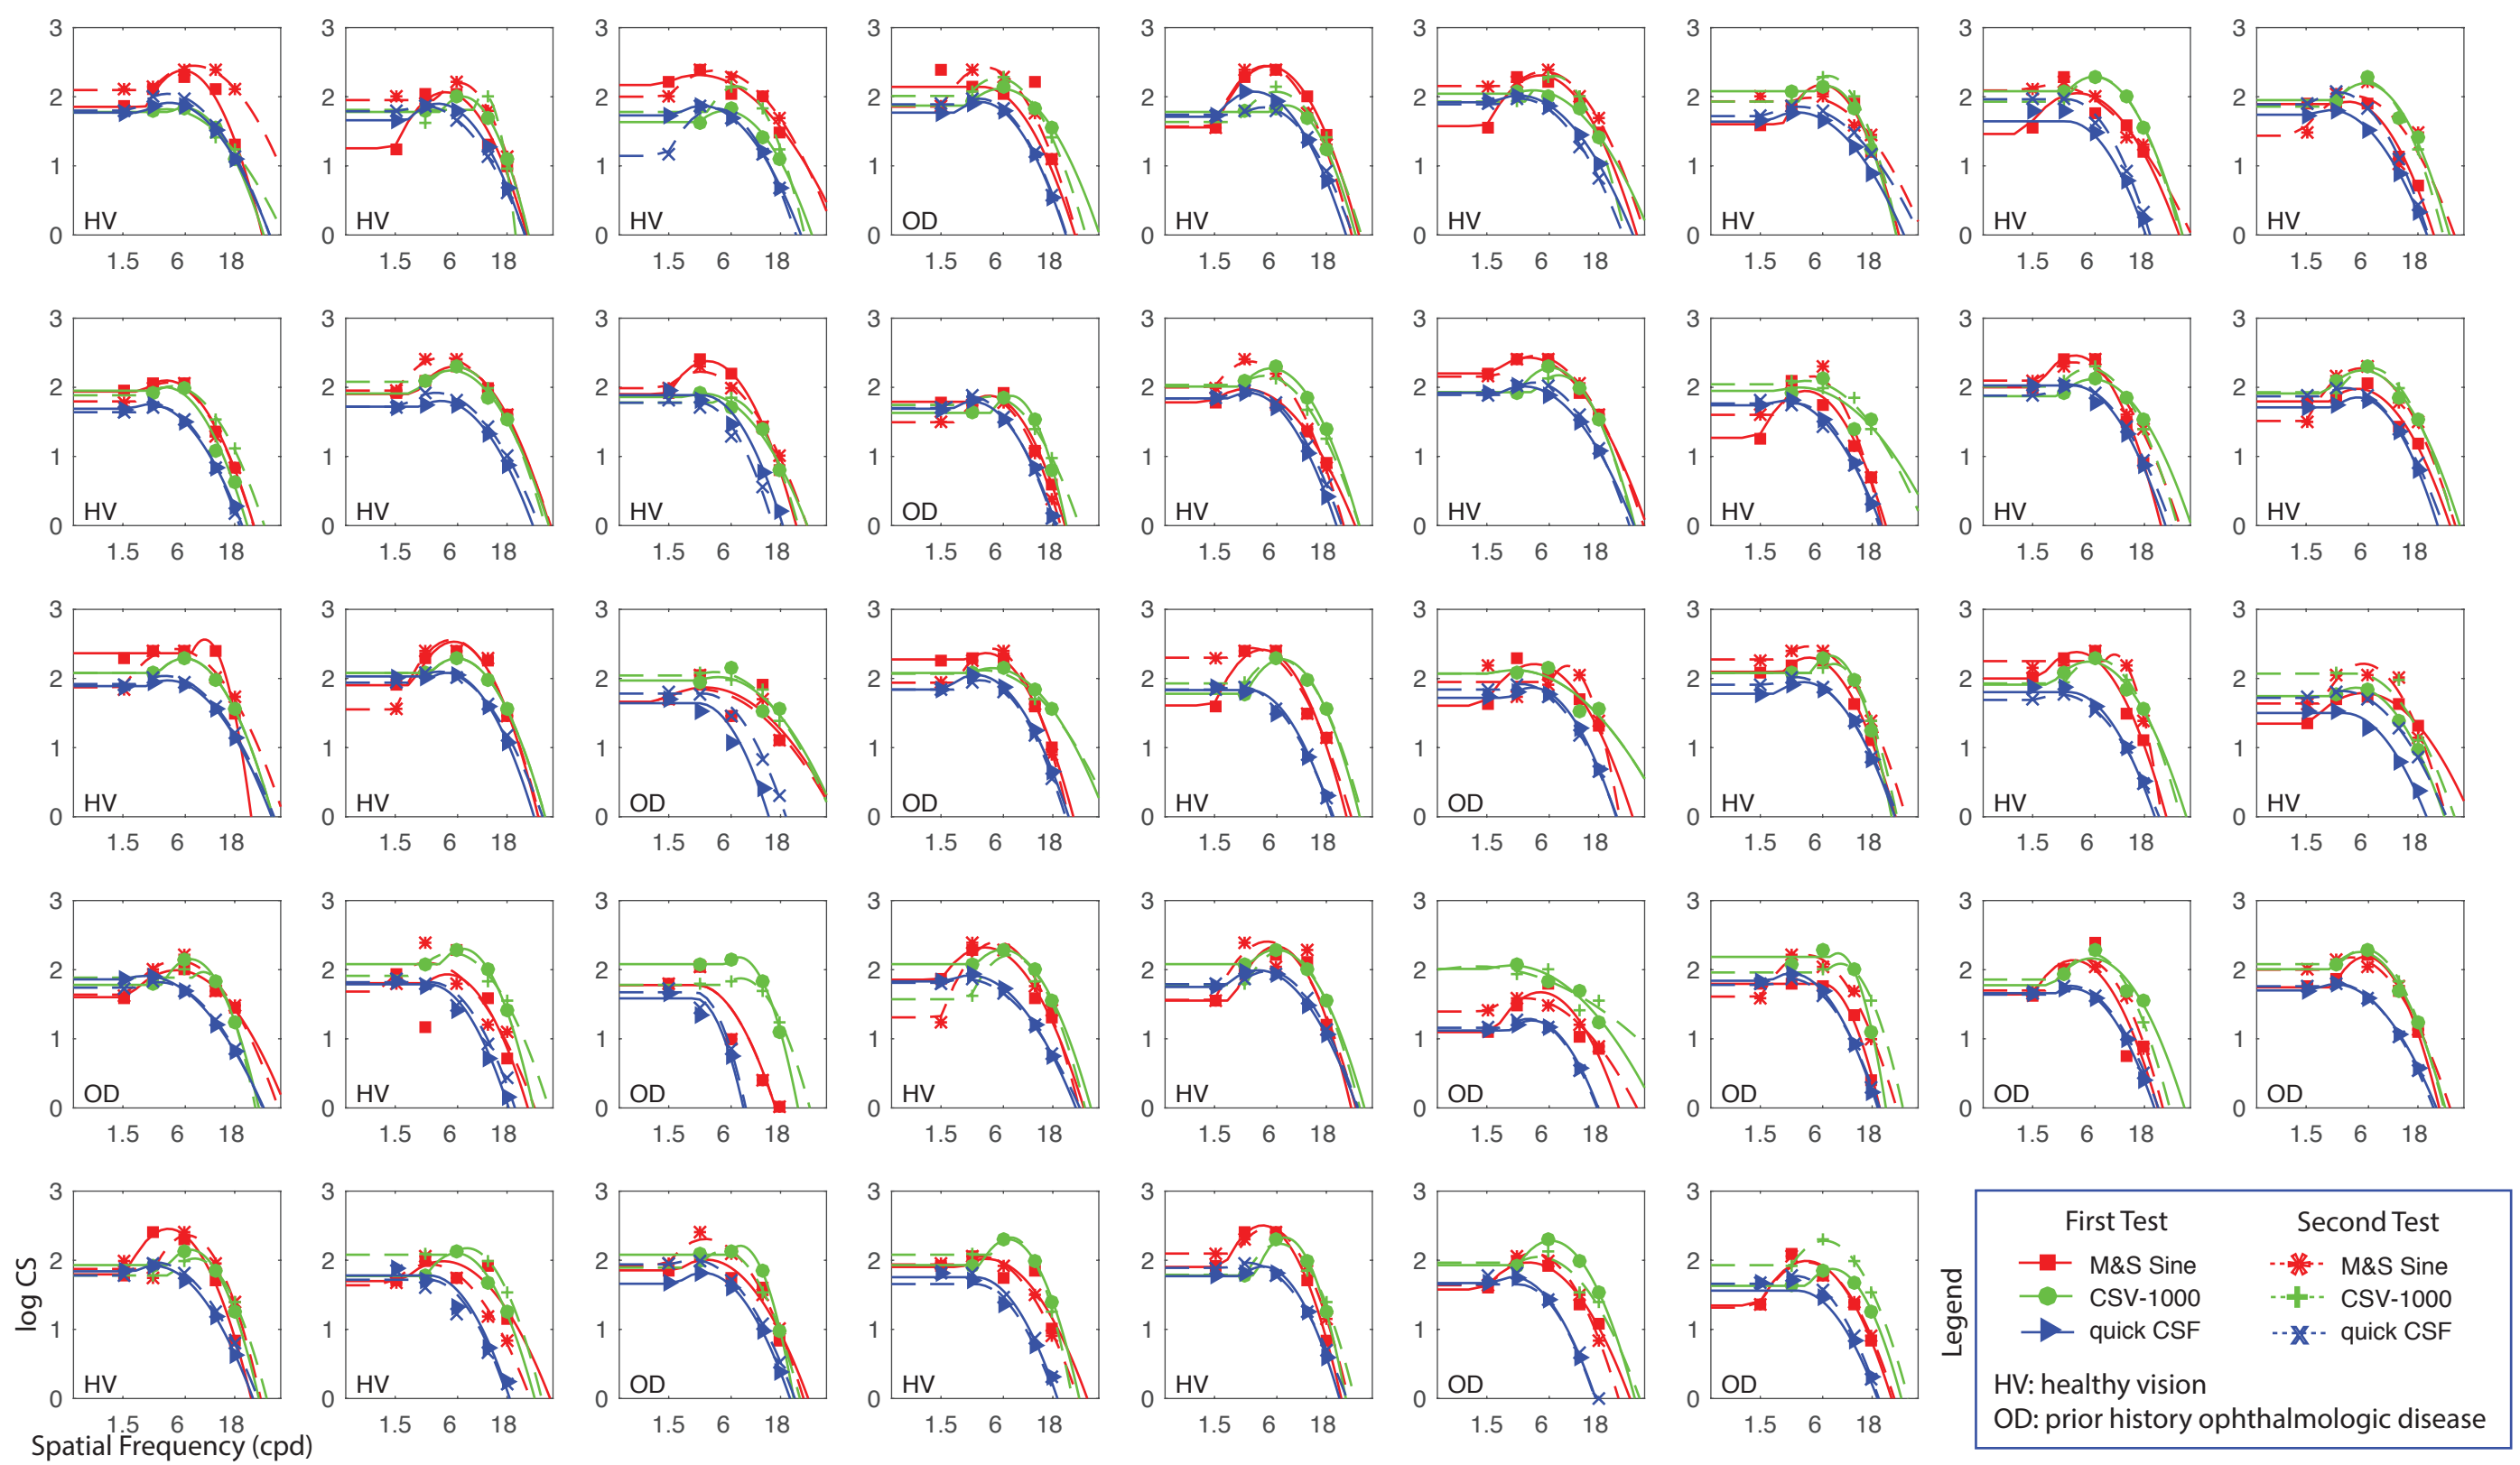

Supplement: JOV-04993-2015-s01.pdf [file JOV-04993-2015-s01.pdf]
